# Supplementary material
Source: PubMed Central journal article supplement (PMC6789281)
Supplement: ajtr0011-5673-f7.pdf [file ajtr0011-5673-f7.pdf]

MSCs attenuate multiple sclerosis

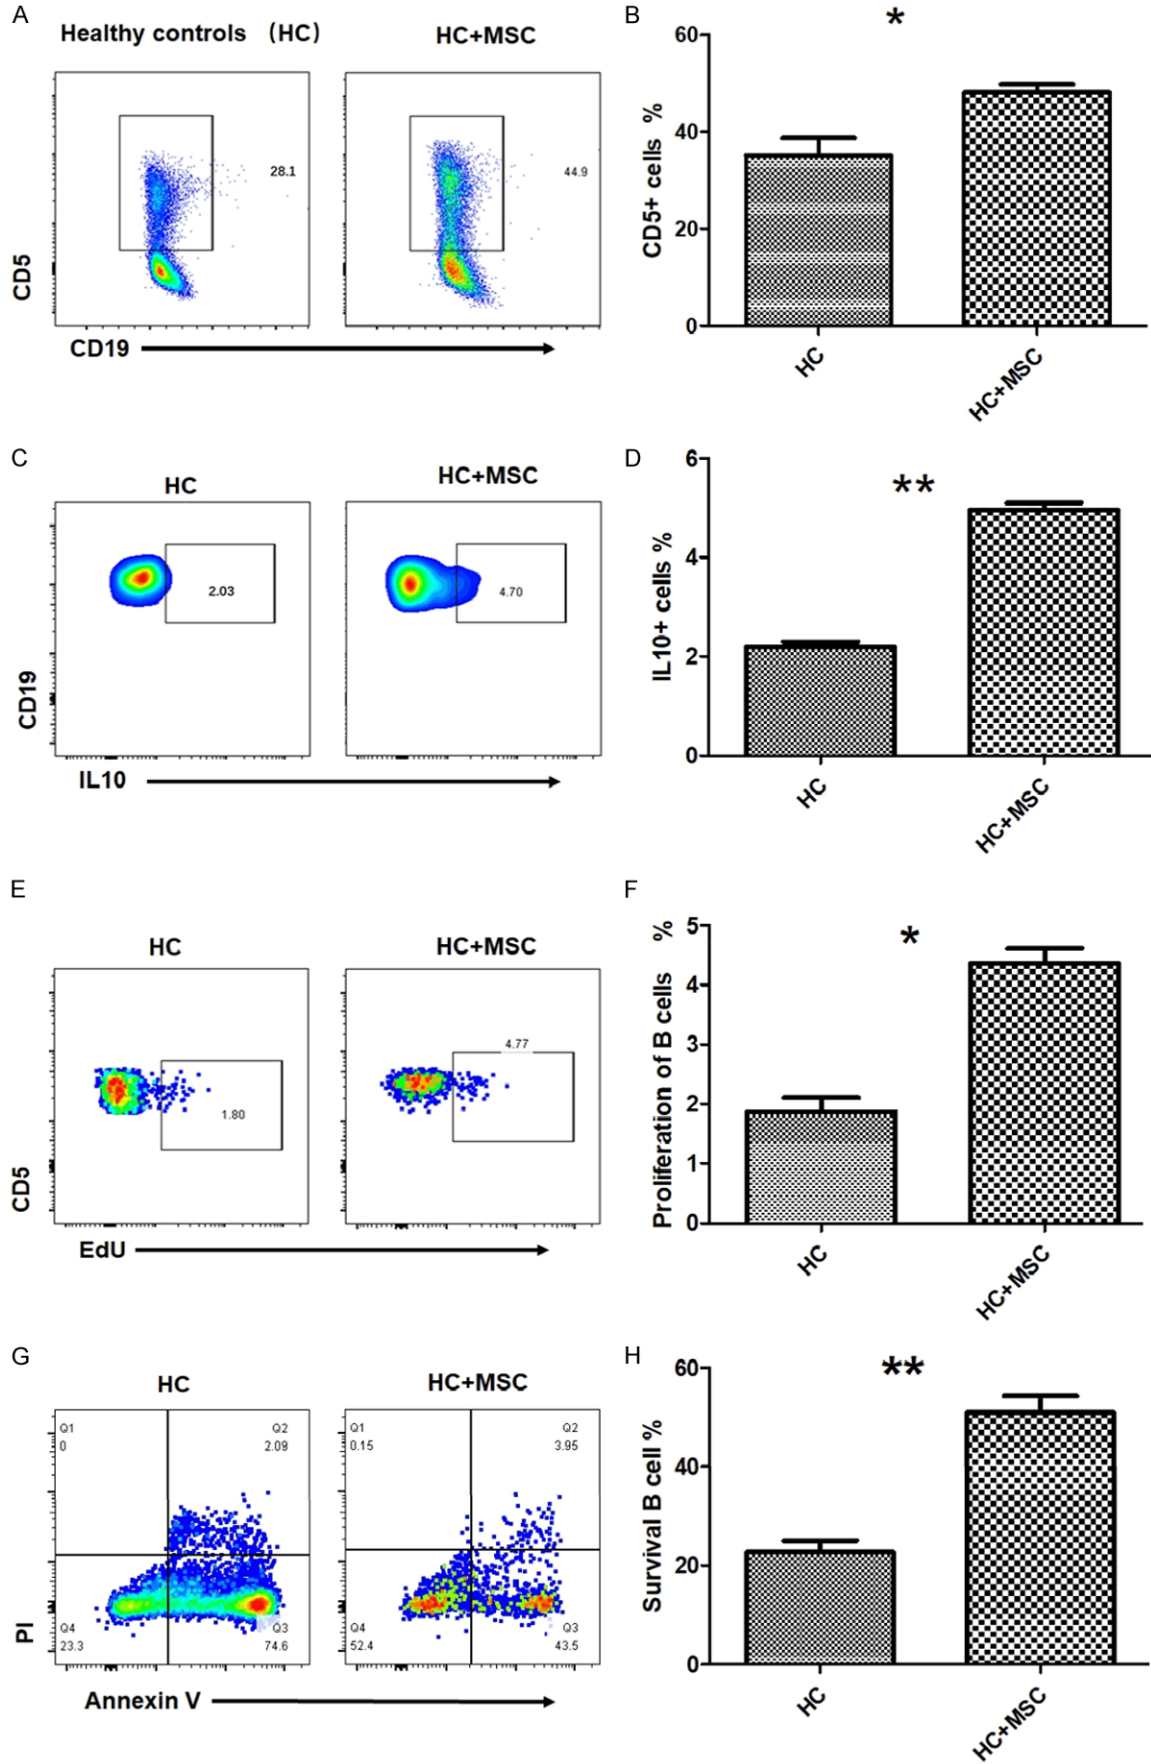

## MSCs attenuate multiple sclerosis

**Figure S1.** The effect of MSCs on CD5+ B cell differentiation, proliferation and survival *in vitro*. The CD5 expression of CD19+ B cells (A and B) in PBMCs alone and PBMCs co-culture with MSCs were detected by FASC. The IL-10 expression of CD19+ B cells (C and D) in PBMCs alone and PBMCs co-culture with MSCs were detected by FASC. In the presence of MSCs, the proliferation (E and F) and survival rate (G and H) of CD5+ B cells were much higher than those in the absence of MSCs. The symbols represent individual samples, the horizontal bars represent the mean, and the error bars show the SEM. Significant differences are indicated as follows: \* $P < 0.05$ , \*\* $P < 0.01$ .
